# Supplementary material for: Glucose oxidation performance is improved by the use of a supramolecular self-assembly of glucose oxidase and catalase
Source: Royal Society of Chemistry journal article supplement (doi:10.1039/c8cy01945b), 2018-12-15
Supplement: c8cy01945b1.pdf [file c8cy01945b1.pdf]

## Supporting Information

Glucose oxidation performance is improved by the use of a supramolecular self-assembly of glucose oxidase and catalase

Caixia Cui <sup>a,b</sup>, Yunming Fang <sup>\*,a</sup>, Biqiang Chen<sup>\*,a</sup> and Tianwei Tan<sup>a</sup>

<sup>a</sup>: National Energy R&D Center for Biorefinery, Beijing Key Laboratory of Bioprocess, College of Life Science and Technology, Beijing University of Chemical Technology, Beijing 100029, PR China

<sup>b</sup>: Synthetic Biology Engineering Lab of Henan Province, School of Life Science and Technology, Xinxiang Medical University, Xinxiang 453003, PR China

Corresponding author:

Yunming fang, E-mail: fangym@mail.buct.edu.cn

Biqiang chen, E-mail: chenbq@mail.buct.edu.cn

## Methods

### Preparation of 6-carboxyl- $\beta$ -CD

#### (i) CD-OTs

$\beta$ -CD (18 g, 16 mmol) was dissolved in 250 mL of water. 10 mL of a NaOH solution (8.2 mol/L) were added dropwise to the suspension over 5 min with stirring. A solution of p-toluenesulfonylchloride (4.37 g, 23 mmol) in 10 mL of acetonitrile was added dropwise to the mixture and white precipitates appeared immediately after the addition. The mixture was allowed to stir for a further 4 h at room temperature. The pH value of the mixture was adjusted to 6 using 3 mol/L HCl. The precipitates were collected by filtration to give CD-OTs.  $^1\text{H}$  NMR (DMSO- $d_6$ ):  $\delta$  7.77 (d, 2H), 7.43 (d, 2H), 5.83–5.63 (br, 14H), 4.85–4.77 (m, 7H), 4.51–4.20 (m, 9H), 3.7–3.22 (m, 40 H), 2.44 (s, 3H). For the wild CD,  $^1\text{H}$  NMR (DMSO- $d_6$ ):  $\delta$  5.75–5.6 (br, 14H), 4.85–4.8 (m, 7H), 4.5–4.4 (m, 9H), 3.7–3.3 (m, 40 H), 2.4 (s, 3H). By comparing the structure of CD and CD-OTs,  $^1\text{H}$  NMR:  $\delta$  7.77 (d, 2H), 7.43 (d, 2H) proved that p-toluenesulfonyl was successfully grafted on CD.

#### (ii) 6-carboxyl- $\beta$ -CD

CD-OTs (7 g, 5.4 mmol) and alanine (2 g, 22 mmol) were dissolved in 50 mL of a triethanolamine/water (2:3 w/w) solution, and the mixture was stirred at 130°C for 24 h. Solvent was removed by distillation under reduced pressure; ethanol was then added to the residue, and the system was cooled to room temperature. The precipitates were collected by filtration, and then dried in a vacuum oven at 70°C overnight. The product was purified by chromatography using Sephadex<sup>TM</sup> G-25 (water) to give 6-carboxyl- $\beta$ -

CD.  $^1\text{H}$  NMR (400 MHz,  $\text{D}_2\text{O}$ ):  $\delta$  4.99 (m, 7H), 4.04 (m, 1H), 3.89–3.48 (m, 42H), 3.33–3.21 (m, 1H), 3.21–3.08 (m, 1H), 2.49 (t,  $J = 6.4$  Hz, 1H).  $^{13}\text{C}$  NMR (400 MHz,  $\text{D}_2\text{O}$ ):  $\delta$  178.33, 101.81, 101.14, 81.38, 81.18, 80.40, 71.77, 67.50, 60.55, 57.42, 47.66, 44.97, 31.96. Thus,  $^1\text{H}$  NMR:  $\delta$  7.77 (d, 2H), 7.43 (d, 2H) for CD-OTs and 3.89–3.48 (m, 42H) for 6-carboxyl- $\beta$ -CD proved that p-toluenesulfonyl was successfully replaced by alanine.

## Tables

**Table S1.** Kinetic parameters for the GOX/CAT SAME catalyzed preparation of gluconic acid at 35°C based on glucose concentration with different concentration of host to 1:1 GOX: CAT complex.

| The addition of CD in<br>GOX/CAT SAME | $K_m$<br>(mM) | $k_{cat}$<br>(s <sup>-1</sup> ) | $k_{cat}/K_m$<br>(mM <sup>-1</sup> × s <sup>-1</sup> ) |
|---------------------------------------|---------------|---------------------------------|--------------------------------------------------------|
| 0                                     | 7.18          | 187.17                          | 26.08                                                  |
| 100                                   | 2.78          | 167.84                          | 60.33                                                  |
| 200                                   | 1.84          | 176.61                          | 95.76                                                  |
| 500                                   | 1.27          | 178.06                          | 140.00                                                 |
| 800                                   | 0.93          | 175.81                          | 189.70                                                 |
| 1000                                  | 1.30          | 170.57                          | 131.20                                                 |
| 2000                                  | 2.54          | 151.20                          | 59.61                                                  |
| 5000                                  | 2.23          | 134.10                          | 60.22                                                  |

**Table S2.** Kinetic parameters for different enzymes catalyzed formation of gluconic acid at 35°C based on glucose concentration (free GOX, GOX/CAT mixture, GOX/CAT mixture with 800% CD and the GOX/CAT SAME with 800% CD).

|                              | $K_m$<br>(mM) | $k_{cat}$<br>(s <sup>-1</sup> ) | $k_{cat}/K_m$<br>(mM <sup>-1</sup> × s <sup>-1</sup> ) |
|------------------------------|---------------|---------------------------------|--------------------------------------------------------|
| Free GOX                     | 1.01          | 60.13                           | 59.53                                                  |
| GOX/CAT mixture              | 3.42          | 87.72                           | 25.65                                                  |
| GOX/CAT mixture with 800% CD | 3.53          | 82.13                           | 25.33                                                  |
| GOX/CAT SAME 800% CD         | 0.93          | 175.81                          | 189.70                                                 |

## Figures

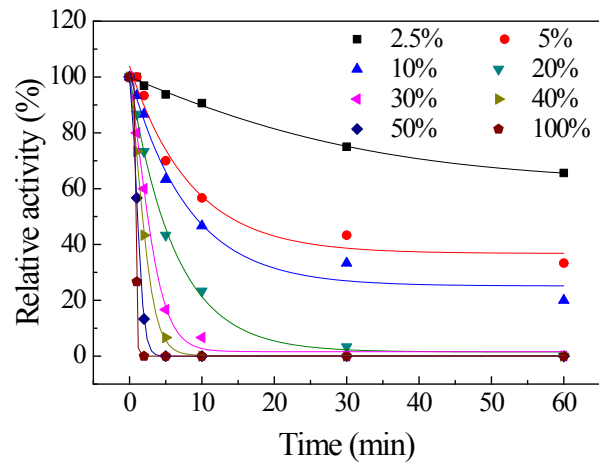

**Figure S1.** The effects of different hydrogen peroxide concentrations on GOX activity. The initial GOX activity was defined as 100%. The 15% (w/v) glucose generated  $\text{H}_2\text{O}_2$  was defined as 100%.

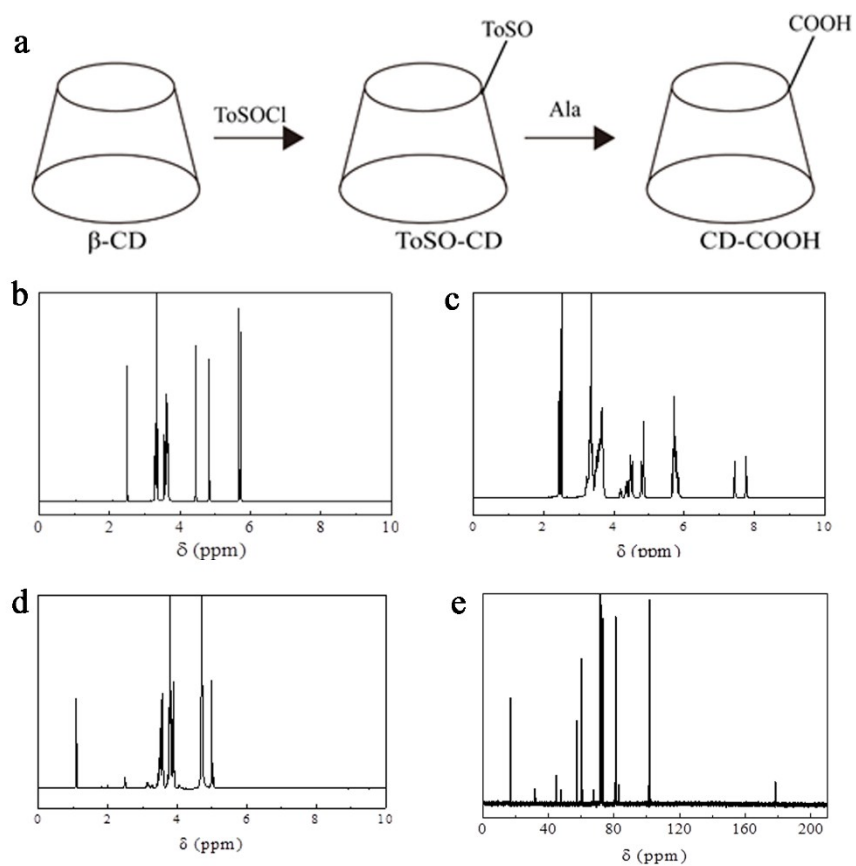

**Figure S2.** The synthesis of 6-carboxyl- $\beta$ -CD. (a) Scheme for the synthesis of 6-carboxyl- $\beta$ -CD. (b)  $^1\text{H}$  NMR of CD. (c)  $^1\text{H}$  NMR of CD-OTs. (d)  $^1\text{H}$  NMR of 6-carboxyl- $\beta$ -CD. (e)  $^{13}\text{C}$  NMR of 6-carboxyl- $\beta$ -CD.

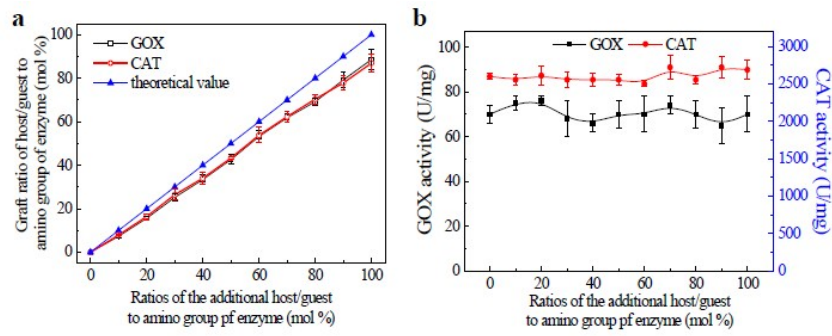

**Figure S3.** (a) Grafting efficiency of 6-carboxyl- $\beta$ -CD and 1-adamantanecarboxylic acid to GOX and CAT, respectively. (b) Activity of GOX and CAT with different CD and AD grafted ratios.



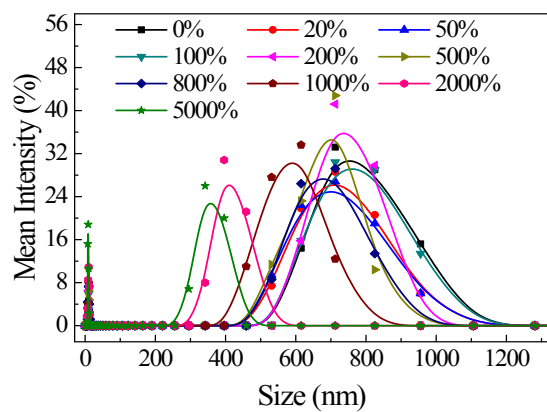

**Figure S4.** DLS analysis of GOX/CAT SAME with the additional of CD.

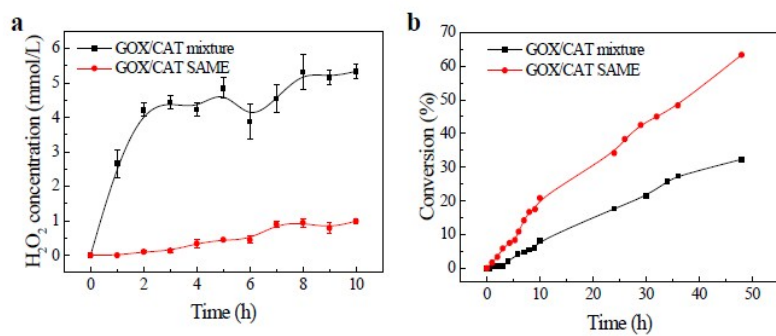

**Figure S5.** (a) Concentrations of H<sub>2</sub>O<sub>2</sub> in GOX/CAT mixture and GOX/CAT SAME system. (b) Conversion of glucose to gluconic acid catalyzed by GOX/CAT mixture and GOX/CAT SAME without the addition of oxygen.
